# Supplementary material for: Lipidomic Analysis of Cervicovaginal Fluid for Elucidating Prognostic Biomarkers and Relevant Phospholipid and Sphingolipid Pathways in Preterm Birth
Source: MDPI journal article supplement (doi:10.3390/metabo13020177), 2023-01-25

# **Lipidomic analysis of cervicovaginal fluid for elucidating prognostic biomarkers and relevant phospholipid and sphingolipid pathways in preterm birth**

**Se Hee Hong<sup>1</sup>, Ji-Youn Lee<sup>1</sup>, Sumin Seo<sup>1</sup>, Bohyun Shin<sup>1</sup>, Cho Hee Jeong<sup>1</sup>, Eunbin Bae<sup>1</sup>, Jiyu Kim<sup>1</sup>, Donghee Lee<sup>1</sup>, Byungchan An<sup>1</sup>, Minki Shim<sup>1</sup>, Jung Hoon Shin<sup>1</sup>, Young Ju Kim<sup>2</sup>, Dong-Kyu Lee<sup>1,\*</sup>, and Sang Beom Han<sup>1,\*</sup>**

<sup>1</sup>College of Pharmacy, Chung-Ang University, 84 Heukseok-ro, Dongjak-gu, Seoul 06974, Korea

<sup>2</sup>Department of Obstetrics and Gynecology and Ewha Medical Research Institute, College of Medicine, Ewha Womans University, Seoul 07984, Korea

\* Correspondence: leedk@cau.ac.kr (D.-K.L.); hansb@cau.ac.kr (S.B.H.)

# Table of Contents

|                                                                                                                                                                                                                                                           |           |
|-----------------------------------------------------------------------------------------------------------------------------------------------------------------------------------------------------------------------------------------------------------|-----------|
| <b>Supplementary Tables .....</b>                                                                                                                                                                                                                         | <b>3</b>  |
| Table S1. Descriptive characteristics among participants.....                                                                                                                                                                                             | 3         |
| Table S2. List of identified lipidomes in PCs.....                                                                                                                                                                                                        | 6         |
| Table S3. List of identified lipidomes in PEs .....                                                                                                                                                                                                       | 7         |
| Table S4. List of identified lipidomes in Plasmeynl-PEs.....                                                                                                                                                                                              | 8         |
| Table S5. List of identified lipidomes in Plasmeynl-PCs.....                                                                                                                                                                                              | 9         |
| Table S6. List of identified lipidomes in SMs .....                                                                                                                                                                                                       | 10        |
| Table S7. List of identified lipidomes in Cers.....                                                                                                                                                                                                       | 11        |
| Table S8. List of identified lipidomes in LysoPCs.....                                                                                                                                                                                                    | 12        |
| Table S9. List of identified lipidomes in LysoPEs.....                                                                                                                                                                                                    | 12        |
| Table S10. List of identified lipidomes in TGs.....                                                                                                                                                                                                       | 13        |
| Table S11. List of identified lipidomes in DGs .....                                                                                                                                                                                                      | 15        |
| <b>Supplementary Figures.....</b>                                                                                                                                                                                                                         | <b>16</b> |
| Figure S1. Spearman rank correlation of lipids in CVF which were used in our study between PTB and TB .....                                                                                                                                               | 16        |
| Figure S2. Heats maps representing (A) PlsPCs and PlsPEs, (B) PEs, (C) Cers, (D) SMs, (E) PCs between PTB and TB. ....                                                                                                                                    | 17        |
| Figure S3. Log 10 peak area of lipidomes in PCs. Orange color in bar graphs and asterisk indicates PTB groups and green color indicates TB. Bar graphs are mean with *p<0.05, **p<0.01, ***p<0.001, and ****0.0001. These are same in Figure S3-S10 ..... | 18        |
| Figure S4. Log 10 peak area of lipidomes in PEs .....                                                                                                                                                                                                     | 19        |
| Figure S5. Log 10 peak area of lipidomes in PlsPCs.....                                                                                                                                                                                                   | 20        |
| Figure S6. Log 10 peak area of lipidomes in PlsPEs .....                                                                                                                                                                                                  | 21        |
| Figure S7. Log 10 peak area of lipidomes in SMs .....                                                                                                                                                                                                     | 22        |
| Figure S8. Log 10 peak area of lipidomes in Cers.....                                                                                                                                                                                                     | 23        |
| Figure S9. Log 10 peak area of lipidomes in TGs.....                                                                                                                                                                                                      | 24        |
| Figure S10. Log 10 peak area of lipidomes in LPCs .....                                                                                                                                                                                                   | 25        |

## Supplementary Tables

Table S1. Descriptive characteristics among participants with (A) PTB and (B) TB

(A)

| No. | Age (y) | Gestational age (wk.) | Sampling week | Pre-Pregnancy BMI (kg/m <sup>2</sup> ) |
|-----|---------|-----------------------|---------------|----------------------------------------|
| P1  | 27      | 34.6                  | 34.5          | 20.24                                  |
| P2  | 33      | 33.2                  | 33.2          | 16.57                                  |
| P3  | 36      | 36.3                  | 19.2          | 21.23                                  |
| P4  | 30      | 36.2                  | 19.1          | 24.30                                  |
| P5  | 27      | 32.3                  | 31.6          | 23.11                                  |
| P6  | 30      | 36.0                  | 18.1          | 19.59                                  |
| P7  | 25      | 33.2                  | 33.2          | 19.95                                  |
| P8  | 34      | 34.0                  | 34.0          | 20.43                                  |
| P9  | 36      | 32.2                  | 32.2          | 21.95                                  |
| P10 | 37      | 36.3                  | 33.5          | 21.23                                  |
| P11 | 33      | 32.5                  | 32.4          | 25.24                                  |
| P12 | 30      | 36.1                  | 24.1          | 23.51                                  |
| P13 | 26      | 28.2                  | 28.2          | 27.10                                  |
| P14 | 36      | 31.2                  | 31.1          | 31.69                                  |
| P15 | 36      | 20.6                  | 20.4          | 22.66                                  |
| P16 | 33      | 36.0                  | 35.1          | 21.20                                  |
| P17 | 30      | 36.1                  | 36.0          | 23.51                                  |
| P18 | 31      | 36.4                  | 36.3          | 21.80                                  |
| P19 | 37      | 36.1                  | 35.5          | 22.64                                  |
| P20 | 30      | 30.6                  | 30.6          | 21.88                                  |
| P21 | 40      | 36.6                  | 34.4          | 27.67                                  |
| P22 | 39      | 27.2                  | 26.4          | 25.33                                  |
| P23 | 28      | 36.1                  | 36.0          | 21.84                                  |
| P24 | 34      | 35.1                  | 33.3          | 21.63                                  |
| P25 | 27      | 33.5                  | 33.4          | 20.06                                  |
| P26 | 31      | 25.4                  | 23.4          | 20.75                                  |
| P27 | 26      | 31.6                  | 29.3          | 21.72                                  |
| P28 | 30      | 31.0                  | 30.6          | 21.38                                  |

|     |    |      |      |       |
|-----|----|------|------|-------|
| P29 | 36 | 33.2 | 21.6 | 21.45 |
| P30 | 30 | 32.6 | 26.1 | 17.04 |

(B)

| No. - | Age (y) | Gestational age (wk.) | Sampling week | Pre-Pregnancy BMI<br>(kg/m <sup>2</sup> ) |
|-------|---------|-----------------------|---------------|-------------------------------------------|
| T1    | 37      | 39.6                  | 37            | 19.03                                     |
| T2    | 35      | 39.6                  | 37.1          | 20.49                                     |
| T3    | 28      | 40                    | 37.2          | 18.83                                     |
| T4    | 29      | 39.4                  | 37.1          | 21.16                                     |
| T5    | 34      | 38.4                  | 35.5          | 21.49                                     |
| T6    | 29      | 39.2                  | 36.1          | 21.13                                     |
| T7    | 34      | 39.3                  | 36.3          | 21.2                                      |
| T8    | 32      | 40.4                  | 39.2          | 22.02                                     |
| T9    | 35      | 40.3                  | 21            | 21.76                                     |
| T10   | 32      | 38.1                  | 23.6          | 22.12                                     |
| T11   | 40      | 38.4                  | 20.3          | 20.96                                     |
| T12   | 36      | 38.3                  | 21.6          | 20.72                                     |
| T13   | 31      | 40.5                  | 37.3          | 17.15                                     |
| T14   | 33      | 39.3                  | 24.2          | 18.65                                     |
| T15   | 31      | 40.1                  | 37.5          | 17.34                                     |
| T16   | 28      | 37.2                  | 36.1          | 20.7                                      |
| T17   | 37      | 38.3                  | 18            | 23.09                                     |
| T18   | 37      | 37.6                  | 21.3          | 20.63                                     |
| T19   | 21      | 38.6                  | 37.1          | 23.95                                     |
| T20   | 30      | 37.4                  | 36.3          | 20.69                                     |
| T21   | 33      | 37.6                  | 37.2          | 19.71                                     |
| T22   | 39      | 38.6                  | 34.3          | 21.1                                      |
| T23   | 38      | 37.6                  | 36.3          | 20.63                                     |
| T24   | 35      | 39.5                  | 24            | 21.23                                     |
| T25   | 36      | 37.6                  | 21.3          | 24.67                                     |
| T26   | 30      | 38.3                  | 36.3          | 26.4                                      |
| T27   | 31      | 39                    | 29.6          | 20.03                                     |
| T28   | 33      | 39.3                  | 39.2          | 19.1                                      |
| T29   | 34      | 37.6                  | 37.5          | 25.85                                     |
| T30   | 35      | 39.3                  | 24            | 20.45                                     |

Table S2. List of identified lipidomes in PCs

| Identity | Retention time (min) | Adduct ion         | Precursor ion (m/z) | Fragment ion (m/z) |
|----------|----------------------|--------------------|---------------------|--------------------|
| PC 20:0  | 13.2                 | [M+H] <sup>+</sup> | 566.385             | 184.073            |
| PC 28:0  | 18.1                 | [M+H] <sup>+</sup> | 678.507             | 184.073            |
| PC 30:0  | 19.8                 | [M+H] <sup>+</sup> | 706.539             | 184.073            |
| PC 30:1  | 18.1                 | [M+H] <sup>+</sup> | 704.523             | 184.073            |
| PC 32:0  | 21.9                 | [M+H] <sup>+</sup> | 734.570             | 184.073            |
| PC 32:1  | 19.9                 | [M+H] <sup>+</sup> | 732.554             | 184.073            |
| PC 32:2  | 18.5                 | [M+H] <sup>+</sup> | 730.539             | 184.073            |
| PC 32:3  | 17.8                 | [M+H] <sup>+</sup> | 728.523             | 184.073            |
| PC 34:0  | 24.1                 | [M+H] <sup>+</sup> | 762.601             | 184.073            |
| PC 34:1  | 21.9                 | [M+H] <sup>+</sup> | 760.586             | 184.073            |
| PC 34:2  | 20.2                 | [M+H] <sup>+</sup> | 758.570             | 184.073            |
| PC 34:3  | 19.0                 | [M+H] <sup>+</sup> | 756.554             | 184.073            |
| PC 34:4  | 17.9                 | [M+H] <sup>+</sup> | 754.539             | 184.073            |
| PC 36:0  | 26.7                 | [M+H] <sup>+</sup> | 790.633             | 184.073            |
| PC 36:1  | 24.0                 | [M+H] <sup>+</sup> | 788.617             | 184.073            |
| PC 36:2  | 21.5                 | [M+H] <sup>+</sup> | 786.601             | 184.073            |
| PC 36:3  | 20.9                 | [M+H] <sup>+</sup> | 784.586             | 184.073            |
| PC 36:4  | 19.5                 | [M+H] <sup>+</sup> | 782.570             | 184.073            |
| PC 36:5  | 17.9                 | [M+H] <sup>+</sup> | 780.554             | 184.073            |
| PC 38:1  | 26.2                 | [M+H] <sup>+</sup> | 816.648             | 184.073            |
| PC 38:2  | 23.6                 | [M+H] <sup>+</sup> | 814.633             | 184.073            |
| PC 38:3  | 22.4                 | [M+H] <sup>+</sup> | 812.617             | 184.073            |
| PC 38:4  | 21.3                 | [M+H] <sup>+</sup> | 810.601             | 184.073            |
| PC 38:5  | 19.4                 | [M+H] <sup>+</sup> | 808.586             | 184.073            |
| PC 38:6  | 18.8                 | [M+H] <sup>+</sup> | 806.570             | 184.073            |
| PC 38:7  | 17.4                 | [M+H] <sup>+</sup> | 804.554             | 184.073            |
| PC 40:1  | 29.2                 | [M+H] <sup>+</sup> | 844.680             | 184.073            |
| PC 40:2  | 26.3                 | [M+H] <sup>+</sup> | 842.664             | 184.073            |
| PC 40:3  | 24.3                 | [M+H] <sup>+</sup> | 840.648             | 184.073            |
| PC 40:4  | 22.3                 | [M+H] <sup>+</sup> | 838.633             | 184.073            |
| PC 40:5  | 21.2                 | [M+H] <sup>+</sup> | 836.617             | 184.073            |
| PC 40:6  | 19.3                 | [M+H] <sup>+</sup> | 834.601             | 184.073            |
| PC 40:7  | 18.8                 | [M+H] <sup>+</sup> | 832.586             | 184.073            |
| PC 40:8  | 17.7                 | [M+H] <sup>+</sup> | 830.570             | 184.073            |
| PC 42:1  | 31.0                 | [M+H] <sup>+</sup> | 872.711             | 184.073            |
| PC 42:2  | 28.7                 | [M+H] <sup>+</sup> | 870.695             | 184.073            |
| PC 42:3  | 26.1                 | [M+H] <sup>+</sup> | 868.680             | 184.073            |
| PC 42:4  | 24.1                 | [M+H] <sup>+</sup> | 866.664             | 184.073            |
| PC 42:5  | 23.3                 | [M+H] <sup>+</sup> | 864.648             | 184.073            |
| PC 42:6  | 21.1                 | [M+H] <sup>+</sup> | 862.633             | 184.073            |
| PC 42:7  | 19.6                 | [M+H] <sup>+</sup> | 860.617             | 184.073            |

Table S3. List of identified lipidomes in PEs

| Identity | Retention time<br>(min) | Adduct ion         | Precursor ion (m/z) | Fragment ion (m/z) |
|----------|-------------------------|--------------------|---------------------|--------------------|
| PE 20:0  | 13.4                    | [M+H] <sup>+</sup> | 524.337             | 383.337            |
| PE 32:0  | 22.5                    | [M+H] <sup>+</sup> | 692.523             | 551.509            |
| PE 32:1  | 20.2                    | [M+H] <sup>+</sup> | 690.507             | 549.487            |
| PE 32:2  | 18.5                    | [M+H] <sup>+</sup> | 688.492             | 547.471            |
| PE 34:0  | 24.8                    | [M+H] <sup>+</sup> | 720.554             | 579.532            |
| PE 34:1  | 22.3                    | [M+H] <sup>+</sup> | 718.539             | 577.522            |
| PE 34:2  | 20.1                    | [M+H] <sup>+</sup> | 716.523             | 575.503            |
| PE 34:3  | 18.7                    | [M+H] <sup>+</sup> | 714.507             | 573.457            |
| PE 36:1  | 24.5                    | [M+H] <sup>+</sup> | 746.570             | 605.554            |
| PE 36:2  | 22.2                    | [M+H] <sup>+</sup> | 744.554             | 603.533            |
| PE 36:3  | 20.4                    | [M+H] <sup>+</sup> | 742.539             | 601.518            |
| PE 36:4  | 19.9                    | [M+H] <sup>+</sup> | 740.523             | 599.503            |
| PE 36:5  | 18.3                    | [M+H] <sup>+</sup> | 738.507             | 597.490            |
| PE 38:1  | 27.1                    | [M+H] <sup>+</sup> | 774.601             | 633.579            |
| PE 38:2  | 24.3                    | [M+H] <sup>+</sup> | 772.586             | 631.554            |
| PE 38:3  | 23.7                    | [M+H] <sup>+</sup> | 770.570             | 629.548            |
| PE 38:4  | 21.9                    | [M+H] <sup>+</sup> | 768.554             | 627.533            |
| PE 38:5  | 19.8                    | [M+H] <sup>+</sup> | 766.539             | 625.517            |
| PE 38:7  | 17.8                    | [M+H] <sup>+</sup> | 762.507             | 621.488            |
| PE 40:10 | 17.8                    | [M+H] <sup>+</sup> | 784.492             | 643.464            |
| PE 40:2  | 26.8                    | [M+H] <sup>+</sup> | 800.617             | 659.581            |
| PE 40:3  | 25.5                    | [M+H] <sup>+</sup> | 798.601             | 657.580            |
| PE 40:4  | 23.4                    | [M+H] <sup>+</sup> | 796.586             | 655.570            |
| PE 40:5  | 22.6                    | [M+H] <sup>+</sup> | 794.570             | 653.256            |
| PE 40:6  | 21.0                    | [M+H] <sup>+</sup> | 792.554             | 651.533            |
| PE 40:7  | 19.2                    | [M+H] <sup>+</sup> | 790.539             | 649.519            |
| PE 42:10 | 19.2                    | [M+H] <sup>+</sup> | 812.523             | 671.498            |
| PE 42:6  | 22.2                    | [M+H] <sup>+</sup> | 820.586             | 679.567            |
| PE 42:7  | 20.2                    | [M+H] <sup>+</sup> | 818.570             | 677.546            |

Table S4. List of identified lipidomes in Plasmenyl-PEs

| Identity          | Retention time<br>(min) | Adduct ion         | Precursor ion (m/z) | Fragment ion (m/z) |
|-------------------|-------------------------|--------------------|---------------------|--------------------|
| plasmenyl-PE 32:0 | 23.6                    | [M+H] <sup>+</sup> | 676.528             | 535.508            |
| plasmenyl-PE 32:1 | 21.2                    | [M+H] <sup>+</sup> | 674.512             | 533.492            |
| plasmenyl-PE 34:0 | 26.2                    | [M+H] <sup>+</sup> | 704.559             | 563.536            |
| plasmenyl-PE 34:1 | 23.5                    | [M+H] <sup>+</sup> | 702.544             | 561.518            |
| plasmenyl-PE 36:0 | 26.5                    | [M+H] <sup>+</sup> | 732.591             | 591.557            |
| plasmenyl-PE 36:1 | 26.0                    | [M+H] <sup>+</sup> | 730.575             | 589.552            |
| plasmenyl-PE 36:2 | 23.3                    | [M+H] <sup>+</sup> | 728.559             | 587.538            |
| plasmenyl-PE 36:3 | 22.6                    | [M+H] <sup>+</sup> | 726.544             | 585.518            |
| plasmenyl-PE 36:4 | 20.8                    | [M+H] <sup>+</sup> | 724.528             | 583.508            |
| plasmenyl-PE 38:1 | 28.6                    | [M+H] <sup>+</sup> | 758.606             | 617.579            |
| plasmenyl-PE 38:2 | 25.5                    | [M+H] <sup>+</sup> | 756.591             | 615.569            |
| plasmenyl-PE 38:3 | 25.0                    | [M+H] <sup>+</sup> | 754.575             | 613.544            |
| plasmenyl-PE 38:4 | 23.0                    | [M+H] <sup>+</sup> | 752.559             | 611.537            |
| plasmenyl-PE 38:5 | 20.7                    | [M+H] <sup>+</sup> | 750.544             | 609.522            |
| plasmenyl-PE 38:6 | 20.0                    | [M+H] <sup>+</sup> | 748.528             | 607.505            |
| plasmenyl-PE 40:1 | 30.8                    | [M+H] <sup>+</sup> | 786.638             | 645.619            |
| plasmenyl-PE 40:3 | 26.8                    | [M+H] <sup>+</sup> | 782.606             | 641.584            |
| plasmenyl-PE 40:4 | 24.1                    | [M+H] <sup>+</sup> | 780.591             | 639.567            |
| plasmenyl-PE 40:5 | 22.8                    | [M+H] <sup>+</sup> | 778.575             | 637.556            |
| plasmenyl-PE 40:6 | 22.0                    | [M+H] <sup>+</sup> | 776.559             | 635.538            |
| plasmenyl-PE 42:2 | 29.7                    | [M+H] <sup>+</sup> | 812.653             | 671.638            |
| plasmenyl-PE 42:3 | 29.0                    | [M+H] <sup>+</sup> | 810.638             | 669.627            |
| plasmenyl-PE 42:4 | 26.6                    | [M+H] <sup>+</sup> | 808.622             | 667.597            |
| plasmenyl-PE 42:5 | 25.1                    | [M+H] <sup>+</sup> | 806.606             | 665.586            |
| plasmenyl-PE 42:6 | 22.6                    | [M+H] <sup>+</sup> | 804.591             | 663.573            |



Table S5. List of identified lipidomes in Plasmenyl-PCs

| Identity          | Retention time (min) | Adduct ion         | Precursor ion (m/z) | Fragment ion (m/z) |
|-------------------|----------------------|--------------------|---------------------|--------------------|
| plasmenyl-PC 30:0 | 19.1                 | [M+H] <sup>+</sup> | 690.544             | 184.073            |
| plasmenyl-PC 32:0 | 20.9                 | [M+H] <sup>+</sup> | 718.575             | 184.073            |
| plasmenyl-PC 34:0 | 23.1                 | [M+H] <sup>+</sup> | 746.606             | 184.073            |
| plasmenyl-PC 34:1 | 22.7                 | [M+H] <sup>+</sup> | 744.591             | 184.073            |
| plasmenyl-PC 36:0 | 25.7                 | [M+H] <sup>+</sup> | 774.638             | 184.073            |
| plasmenyl-PC 36:1 | 25.2                 | [M+H] <sup>+</sup> | 772.622             | 184.073            |
| plasmenyl-PC 36:2 | 22.6                 | [M+H] <sup>+</sup> | 770.606             | 184.073            |
| plasmenyl-PC 36:3 | 20.6                 | [M+H] <sup>+</sup> | 768.591             | 184.073            |
| plasmenyl-PC 36:4 | 20.5                 | [M+H] <sup>+</sup> | 766.575             | 184.073            |
| plasmenyl-PC 36:5 | 20.2                 | [M+H] <sup>+</sup> | 764.559             | 184.073            |
| plasmenyl-PC 38:1 | 27.3                 | [M+H] <sup>+</sup> | 800.653             | 184.073            |
| plasmenyl-PC 38:3 | 22.1                 | [M+H] <sup>+</sup> | 796.622             | 184.073            |
| plasmenyl-PC 38:4 | 20.5                 | [M+H] <sup>+</sup> | 794.606             | 184.073            |
| plasmenyl-PC 38:5 | 20.2                 | [M+H] <sup>+</sup> | 792.591             | 184.073            |
| plasmenyl-PC 40:1 | 29.3                 | [M+H] <sup>+</sup> | 828.685             | 184.073            |
| plasmenyl-PC 40:2 | 26.7                 | [M+H] <sup>+</sup> | 826.669             | 184.073            |
| plasmenyl-PC 40:4 | 27.3                 | [M+H] <sup>+</sup> | 822.638             | 184.073            |
| plasmenyl-PC 42:5 | 26.8                 | [M+H] <sup>+</sup> | 848.653             | 184.073            |

Table S6. List of identified lipidomes in SMs

| Identity | Retention time<br>(min) | Adduct ion         | Precursor ion (m/z) | Fragment ion (m/z) |
|----------|-------------------------|--------------------|---------------------|--------------------|
| SM 32:1  | 18.4                    | [M+H] <sup>+</sup> | 675.544             | 184.073            |
| SM 34:2  | 18.4                    | [M+H] <sup>+</sup> | 701.560             | 184.073            |
| SM 34:1  | 20.2                    | [M+H] <sup>+</sup> | 703.575             | 184.073            |
| SM 34:0  | 21.0                    | [M+H] <sup>+</sup> | 705.591             | 184.073            |
| SM 35:1  | 21.4                    | [M+H] <sup>+</sup> | 717.593             | 184.073            |
| SM 36:2  | 20.2                    | [M+H] <sup>+</sup> | 729.591             | 184.073            |
| SM 36:1  | 22.3                    | [M+H] <sup>+</sup> | 731.607             | 184.073            |
| SM 36:0  | 23.4                    | [M+H] <sup>+</sup> | 733.622             | 184.073            |
| SM 38:1  | 24.3                    | [M+H] <sup>+</sup> | 759.638             | 184.073            |
| SM 38:0  | 26.0                    | [M+H] <sup>+</sup> | 761.654             | 184.073            |
| SM 40:2  | 24.4                    | [M+H] <sup>+</sup> | 785.654             | 184.073            |
| SM 40:1  | 27.6                    | [M+H] <sup>+</sup> | 787.669             | 184.073            |
| SM 40:0  | 28.8                    | [M+H] <sup>+</sup> | 789.685             | 184.073            |
| SM 42:2  | 27.0                    | [M+H] <sup>+</sup> | 813.685             | 184.073            |
| SM 42:1  | 30.1                    | [M+H] <sup>+</sup> | 815.701             | 184.073            |

Table S7. List of identified lipidomes in Cers

| Identity     | Retention time<br>(min) | Adduct ion         | Precursor ion (m/z) | Fragment ion (m/z) |
|--------------|-------------------------|--------------------|---------------------|--------------------|
| Cer 34:1; O2 | 21.9                    | [M+H] <sup>+</sup> | 538.519             | 264.267            |
| Cer 35:1; O2 | 23.3                    | [M+H] <sup>+</sup> | 552.535             | 264.267            |
| Cer 36:1; O2 | 24.2                    | [M+H] <sup>+</sup> | 566.551             | 264.267            |
| Cer 38:1; O2 | 27.0                    | [M+H] <sup>+</sup> | 594.582             | 264.267            |
| Cer 40:1; O2 | 29.6                    | [M+H] <sup>+</sup> | 622.613             | 264.267            |
| Cer 40:2; O2 | 26.4                    | [M+H] <sup>+</sup> | 620.598             | 264.267            |
| Cer 42:1; O2 | 31.4                    | [M+H] <sup>+</sup> | 650.645             | 264.267            |
| Cer 42:2; O2 | 29.2                    | [M+H] <sup>+</sup> | 648.629             | 264.267            |
| Cer 44:2; O2 | 30.5                    | [M+H] <sup>+</sup> | 676.660             | 264.267            |

Table S8. List of identified lipidomes in LysoPCs

| Identity    | Retention time (min) | Adduct ion         | Precursor ion (m/z) | Fragment ion (m/z) |
|-------------|----------------------|--------------------|---------------------|--------------------|
| LysoPC 16:0 | 12.3                 | [M+H] <sup>+</sup> | 496.340             | 184.073            |
| LysoPC 18:0 | 14.1                 | [M+H] <sup>+</sup> | 524.372             | 184.073            |
| LysoPC 18:1 | 12.5                 | [M+H] <sup>+</sup> | 522.356             | 184.073            |
| LysoPC 18:3 | 12.3                 | [M+H] <sup>+</sup> | 518.325             | 184.073            |
| LysoPC 20:0 | 15.3                 | [M+H] <sup>+</sup> | 552.403             | 184.073            |
| LysoPC 20:4 | 11.7                 | [M+H] <sup>+</sup> | 544.340             | 184.073            |
| LysoPC 22:0 | 16.3                 | [M+H] <sup>+</sup> | 580.434             | 184.073            |

Table S9. List of identified lipidomes in LysoPEs

| Identity    | Retention time (min) | Adduct ion         | Precursor ion (m/z) | Fragment ion (m/z) |
|-------------|----------------------|--------------------|---------------------|--------------------|
| LysoPE 16:0 | 12.6                 | [M+H] <sup>+</sup> | 454.293             | 313.293            |
| LysoPE 18:0 | 14.3                 | [M+H] <sup>+</sup> | 482.325             | 341.325            |
| LysoPE 18:1 | 12.8                 | [M+H] <sup>+</sup> | 480.309             | 339.309            |

Table S10. List of identified lipidomes in TGs

| Identity | Retention time (min) | Adduct ion                        | Precursor ion (m/z) | Fragment ion (m/z) | Fatty acyl chain |
|----------|----------------------|-----------------------------------|---------------------|--------------------|------------------|
| TG 42:0  | 32.6                 | [M+NH <sub>4</sub> ] <sup>+</sup> | 740.676             | 523                | C12:0            |
|          |                      |                                   | 740.676             | 495                | C14:0            |
|          |                      |                                   | 740.676             | 467                | C16:0            |
|          |                      |                                   | 740.676             | 439                | C18:0            |
| TG 44:0  | 33.4                 | [M+NH <sub>4</sub> ] <sup>+</sup> | 768.708             | 467                | C18:0            |
|          |                      |                                   | 768.708             | 495                | C16:0            |
|          |                      |                                   | 768.708             | 523                | C14:0            |
|          |                      |                                   | 768.708             | 551                | C12:0            |
| TG 44:1  | 32.6                 | [M+NH <sub>4</sub> ] <sup>+</sup> | 766.692             | 495                | C16:1            |
|          |                      |                                   | 766.692             | 521                | C14:0            |
| TG 46:0  | 34.1                 | [M+NH <sub>4</sub> ] <sup>+</sup> | 796.739             | 523                | C16:0            |
|          |                      |                                   | 796.739             | 551                | C14:0            |
| TG 46:1  | 33.4                 | [M+NH <sub>4</sub> ] <sup>+</sup> | 794.723             | 495                | C18:1            |
|          |                      |                                   | 794.723             | 523                | C16:1            |
|          |                      |                                   | 794.723             | 549                | C14:0            |
| TG 46:2  | 32.7                 | [M+NH <sub>4</sub> ] <sup>+</sup> | 792.708             | 521                | C16:1            |
|          |                      |                                   | 792.708             | 547                | C14:0            |
| TG 48:0  | 34.8                 | [M+NH <sub>4</sub> ] <sup>+</sup> | 824.770             | 551                | C16:0            |
| TG 48:3  | 32.7                 | [M+NH <sub>4</sub> ] <sup>+</sup> | 818.723             | 547                | C16:1            |
|          |                      |                                   | 818.723             | 521                | C18:2            |
|          |                      |                                   | 818.723             | 573                | C14:0            |
| TG 50:0  | 35.5                 | [M+NH <sub>4</sub> ] <sup>+</sup> | 852.802             | 551                | C18:0            |
|          |                      |                                   | 852.802             | 579                | C16:0            |
|          |                      |                                   | 852.802             | 607                | C14:0            |
| TG 50:1  | 34.6                 | [M+NH <sub>4</sub> ] <sup>+</sup> | 850.786             | 577                | C16:0            |
|          |                      |                                   | 850.786             | 551                | C18:1            |
|          |                      |                                   | 850.786             | 605                | C14:0            |
| TG 50:2  | 34.0                 | [M+NH <sub>4</sub> ] <sup>+</sup> | 848.770             | 549                | C18:1            |
|          |                      |                                   | 848.770             | 603                | C14:0            |
|          |                      |                                   | 848.770             | 577                | C16:1            |
| TG 50:3  | 33.3                 | [M+NH <sub>4</sub> ] <sup>+</sup> | 846.755             | 547                | C18:1            |
|          |                      |                                   | 846.755             | 575                | C16:1            |
| TG 50:5  | 31.6                 | [M+NH <sub>4</sub> ] <sup>+</sup> | 842.723             | 551                | C18:5            |
|          |                      |                                   | 842.723             | 569                | C16:0            |
| TG 52:0  | 36.3                 | [M+NH <sub>4</sub> ] <sup>+</sup> | 880.833             | 607                | C16:0            |
|          |                      |                                   | 880.833             | 579                | C18:0            |
| TG 52:1  | 35.3                 | [M+NH <sub>4</sub> ] <sup>+</sup> | 878.817             | 579                | C18:1            |
|          |                      |                                   | 878.817             | 605                | C16:0            |
|          |                      |                                   | 878.817             | 633                | C14:0            |
|          |                      |                                   | 878.817             | 549                | C20:0            |
| TG 52:2  | 34.5                 | [M+NH <sub>4</sub> ] <sup>+</sup> | 876.802             | 603                | C16:0            |
|          |                      |                                   | 876.802             | 577                | C18:1            |
| TG 52:3  | 33.8                 | [M+NH <sub>4</sub> ] <sup>+</sup> | 874.786             | 603                | C16:1            |
|          |                      |                                   | 874.786             | 601                | C16:0            |
|          |                      |                                   | 874.786             | 551                | C20:3            |
| TG 52:5  | 32.7                 | [M+NH <sub>4</sub> ] <sup>+</sup> | 870.755             | 551                | C20:5            |
|          |                      |                                   | 870.755             | 597                | C16:0            |
| TG 52:6  | 31.7                 | [M+NH <sub>4</sub> ] <sup>+</sup> | 868.739             | 597                | C16:1            |
|          |                      |                                   | 868.739             | 575                | C18:4            |

|         |      |                                    |         |     |       |
|---------|------|------------------------------------|---------|-----|-------|
| TG 54:0 | 37.1 | [M+NH <sub>4</sub> ] <sup>+</sup>  | 908.864 | 607 | C18:0 |
| TG 54:1 | 36.0 | [M+NH <sub>4</sub> ] <sup>+</sup>  | 906.848 | 607 | C18:1 |
|         |      |                                    | 906.848 | 689 | C12:0 |
|         |      |                                    | 906.848 | 577 | C20:0 |
|         |      |                                    | 906.848 | 521 | C24:0 |
|         |      |                                    | 906.848 | 633 | C16:0 |
|         |      |                                    | 906.848 | 661 | C14:0 |
| TG 54:2 | 35.1 | [M+NH <sub>4</sub> ] <sup>+</sup>  | 904.833 | 605 | C18:1 |
|         |      |                                    | 904.833 | 631 | C16:0 |
|         |      |                                    | 904.833 | 577 | C20:1 |
| TG 54:3 | 34.4 | [M+NH <sub>4</sub> ] <sup>+</sup>  | 902.817 | 603 | C18:1 |
| TG 54:4 | 33.7 | [M+NH <sub>4</sub> ] <sup>+</sup>  | 900.802 | 601 | C18:1 |
|         |      |                                    | 900.802 | 627 | C16:0 |
|         |      |                                    | 900.802 | 577 | C20:3 |
| TG 54:5 | 32.9 | [M+NH <sub>4</sub> ] <sup>+</sup>  | 898.786 | 579 | C20:5 |
|         |      |                                    | 898.786 | 625 | C16:0 |
| TG 54:6 | 32.3 | [M+NH <sub>4</sub> ] <sup>++</sup> | 896.770 | 579 | C20:6 |
|         |      |                                    | 896.770 | 601 | C18:3 |
|         |      |                                    | 896.770 | 627 | C16:2 |
|         |      |                                    | 896.770 | 599 | C18:2 |
|         |      |                                    | 896.770 | 623 | C16:0 |
|         |      |                                    | 896.770 | 597 | C18:1 |
|         |      |                                    | 896.770 | 569 | C20:1 |
|         |      |                                    | 896.770 | 651 | C14:0 |
|         |      |                                    | 896.770 | 577 | C20:5 |
| TG 56:0 | 37.7 | [M+NH <sub>4</sub> ] <sup>+</sup>  | 936.895 | 663 | C16:0 |
|         |      |                                    | 936.895 | 551 | C24:0 |
| TG 56:1 | 36.8 | [M+NH <sub>4</sub> ] <sup>+</sup>  | 934.880 | 635 | C18:1 |
|         |      |                                    | 934.880 | 605 | C20:0 |
|         |      |                                    | 934.880 | 689 | C14:0 |
|         |      |                                    | 934.880 | 661 | C16:0 |
|         |      |                                    | 934.880 | 577 | C22:0 |
|         |      |                                    | 934.880 | 549 | C24:0 |
| TG 56:6 | 32.4 | [M+NH <sub>4</sub> ] <sup>+</sup>  | 924.802 | 603 | C20:4 |
|         |      |                                    | 924.802 | 625 | C18:1 |
| TG 58:0 | 38.8 | [M+NH <sub>4</sub> ] <sup>+</sup>  | 964.927 | 691 | C16:0 |
| TG 58:6 | 33.6 | [M+NH <sub>4</sub> ] <sup>+</sup>  | 952.833 | 603 | C22:9 |
|         |      |                                    | 952.833 | 607 | C22:9 |
|         |      |                                    | 952.833 | 653 | C18:1 |
| TG 60:0 | 40.3 | [M+NH <sub>4</sub> ] <sup>+</sup>  | 992.958 | 607 | C24:0 |
|         |      |                                    | 992.958 | 691 | C18:0 |

Table S11. List of identified lipidomes in DGs

| Identity | Retention time<br>(min) | Adduct ion                        | Precursor ion<br>(m/z) | Fragment ion<br>(m/z) | Fatty acyl<br>chain |
|----------|-------------------------|-----------------------------------|------------------------|-----------------------|---------------------|
| DG 30:0  | 23.2                    | [M+NH <sub>4</sub> ] <sup>+</sup> | 558.509                | 313                   | C14:0               |
|          |                         |                                   | 558.509                | 285                   | C16:0               |
| DG 32:0  | 25.6                    | [M+NH <sub>4</sub> ] <sup>+</sup> | 586.541                | 313                   | C16:0               |
| DG 34:0  | 28.2                    | [M+NH <sub>4</sub> ] <sup>+</sup> | 614.572                | 313                   | C18:0               |
|          |                         |                                   | 614.572                | 341                   | C16:0               |
| DG 34:1  | 25.3                    | [M+NH <sub>4</sub> ] <sup>+</sup> | 612.556                | 339                   | C16:0               |
|          |                         |                                   | 612.556                | 313                   | C18:1               |
| DG 36:0  | 30.5                    | [M+NH <sub>4</sub> ] <sup>+</sup> | 642.603                | 341                   | C18:0               |
| DG 36:5  | 26.9                    | [M+NH <sub>4</sub> ] <sup>+</sup> | 632.525                | 359                   | C16:0               |
|          |                         |                                   | 632.525                | 313                   | C20:5               |
| DG 38:3  | 26.9                    | [M+NH <sub>4</sub> ] <sup>+</sup> | 664.588                | 341                   | C20:3               |
|          |                         |                                   | 664.588                | 363                   | C18:0               |
| DG 40:10 | 18.1                    | [M+NH <sub>4</sub> ] <sup>+</sup> | 679.509                | 313                   | C24:10              |
|          |                         |                                   | 682.509                | 443                   | C14:3               |
|          |                         |                                   | 682.509                | 409                   | C16:0               |
|          |                         |                                   | 682.509                | 283                   | C26:7               |
| DG 34:5  | 24.2                    | [M+NH <sub>4</sub> ] <sup>+</sup> | 604.494                | 335                   | C16:2               |
|          |                         |                                   | 605.494                | 361                   | C14:1               |
|          |                         |                                   | 608.494                | 313                   | C18:3               |
|          |                         |                                   | 607.494                | 285                   | C20:4               |

## Supplementary Figures

Figure S1. Spearman rank correlation of lipids in CVF which were used in our study between PTB and TB

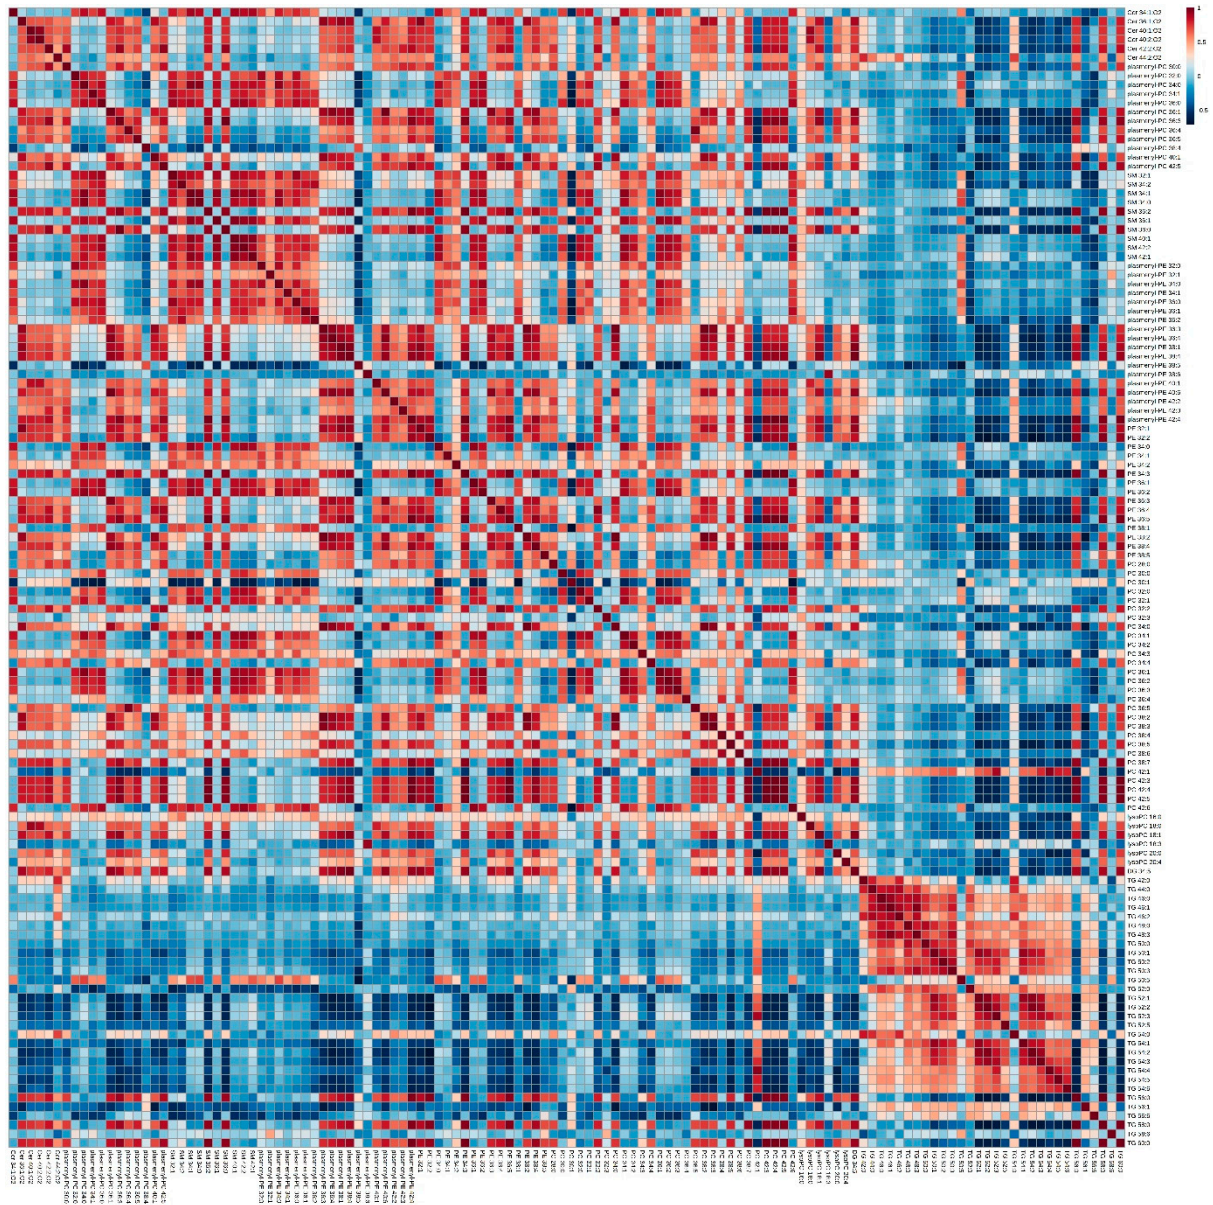



Figure S2. Heats maps representing (A) PlsPCs and PlsPEs, (B) PEs, (C) Cers, (D) SMs, (E) PCs between PTB and TB.

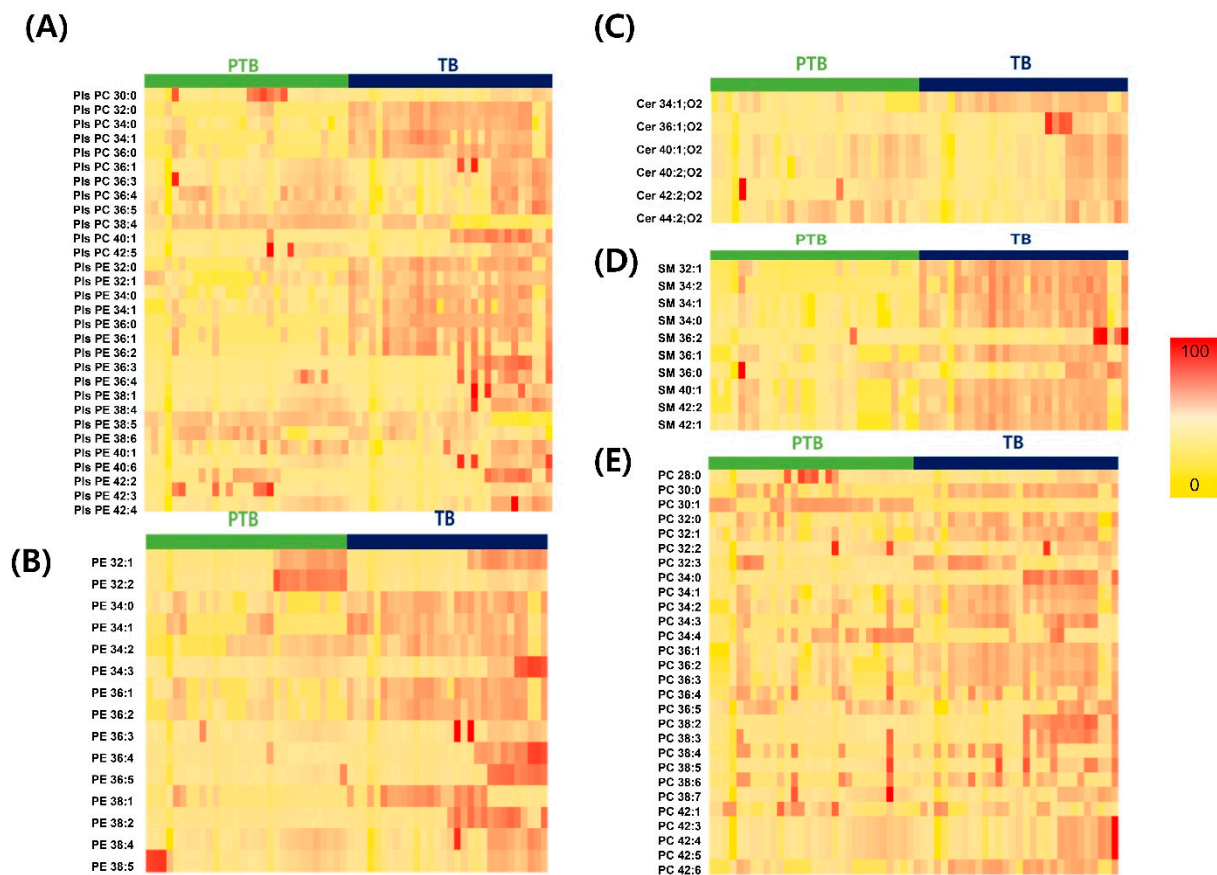

Figure S3. Log 10 peak area of lipidomes in PCs. Orange color in bar graphs and asterisk indicates PTB groups and green color indicates TB. Bar graphs are mean with \* $p < 0.05$ , \*\* $p < 0.01$ , \*\*\* $p < 0.001$ , and \*\*\*\* $p < 0.0001$ . These are same in Figure S3-S10

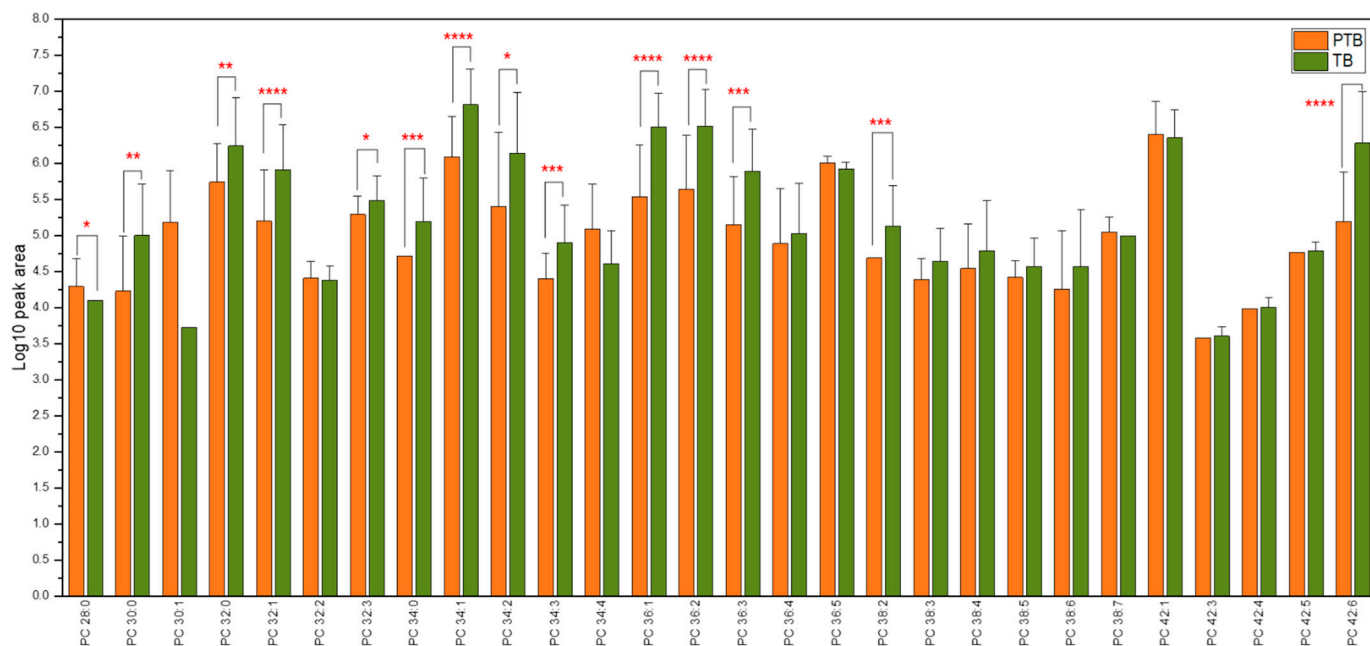

Figure S4. Log 10 peak area of lipidomes in PEs

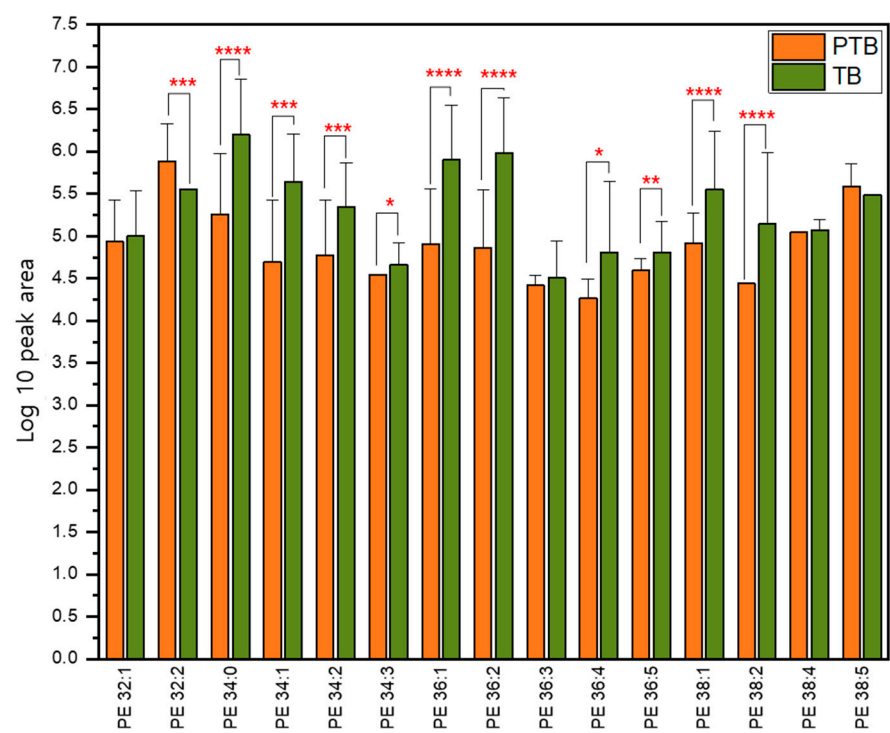

Figure S5. Log 10 peak area of lipidomes in PlsPCs

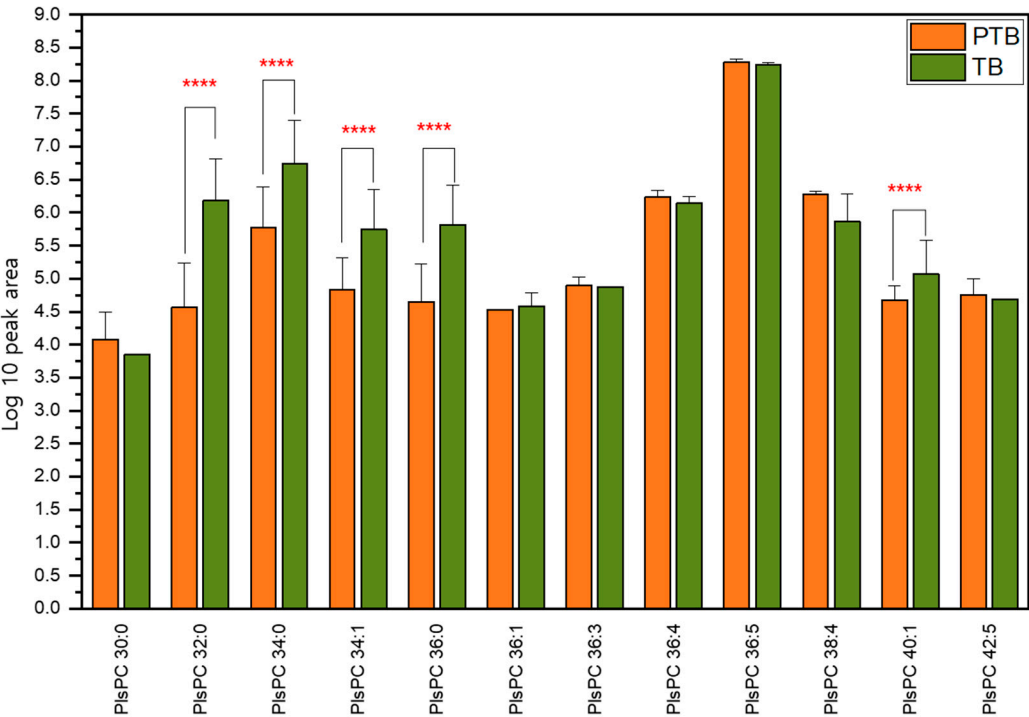

Figure S6. Log 10 peak area of lipidomes in PlsPEs

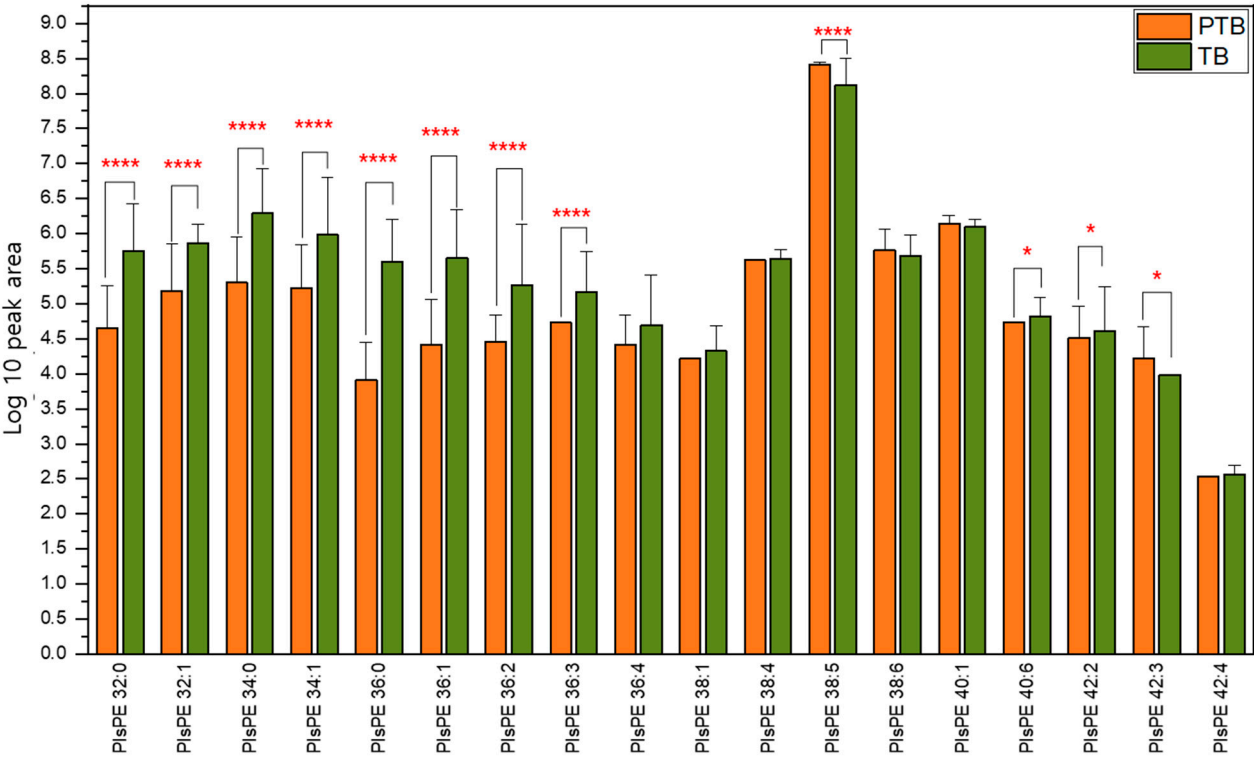

Figure S7. Log 10 peak area of lipidomes in SMs

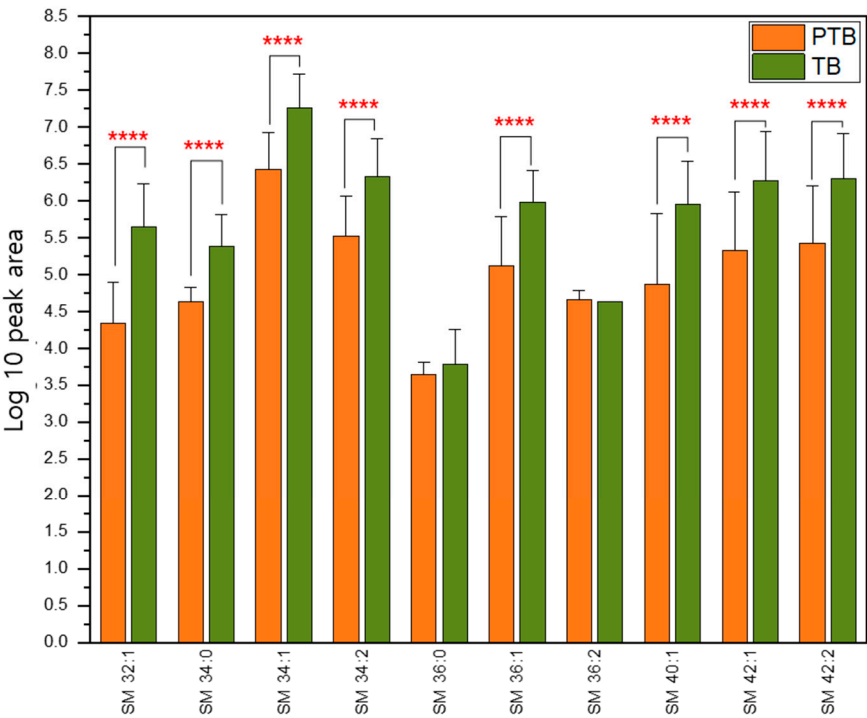

Figure S8. Log 10 peak area of lipidomes in Cers

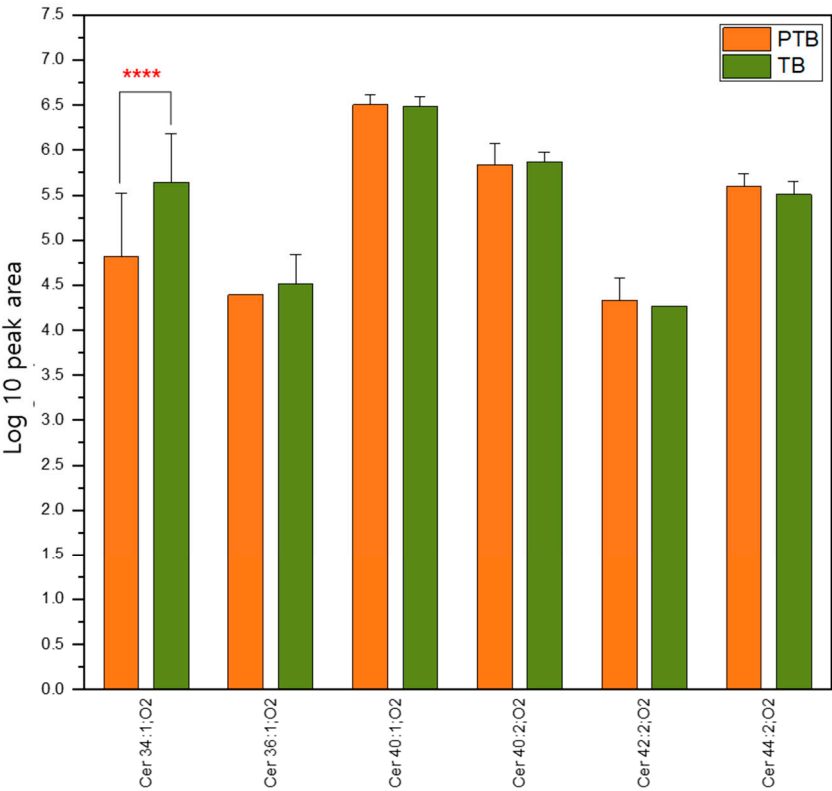

Figure S9. Log 10 peak area of lipidomes in TGs

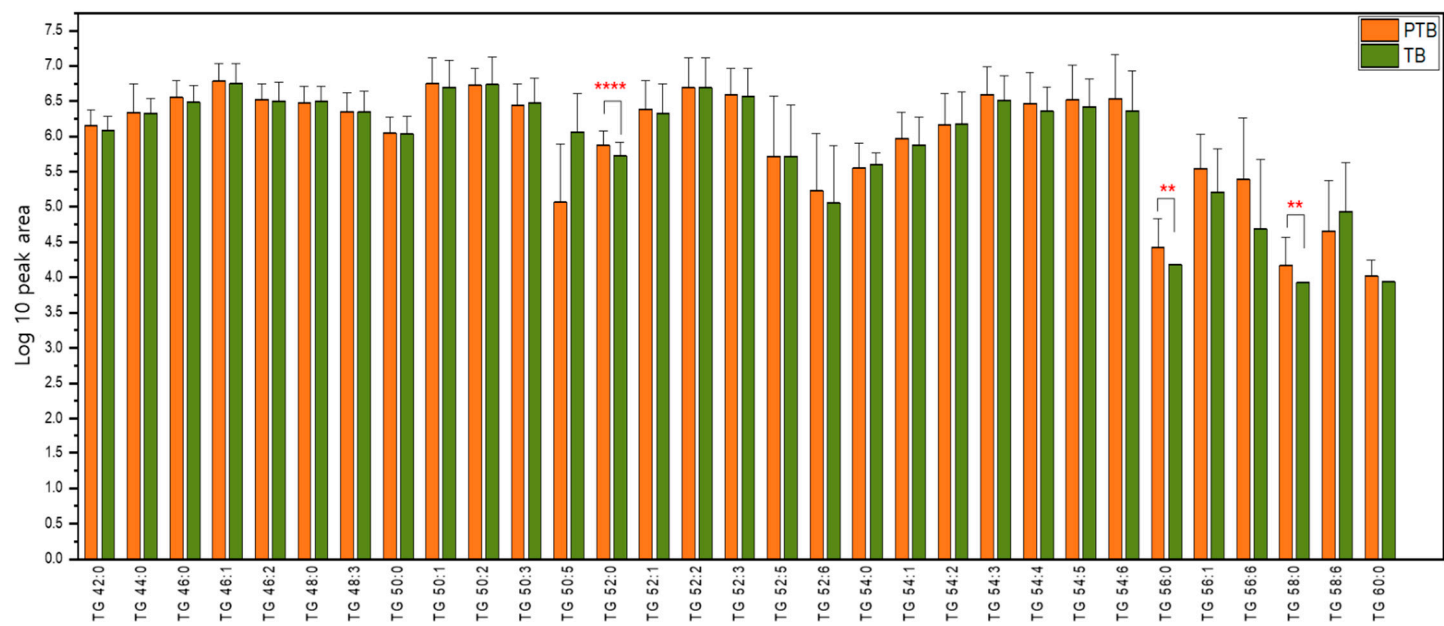



Figure S10. Log 10 peak area of lipidomes in LPCs

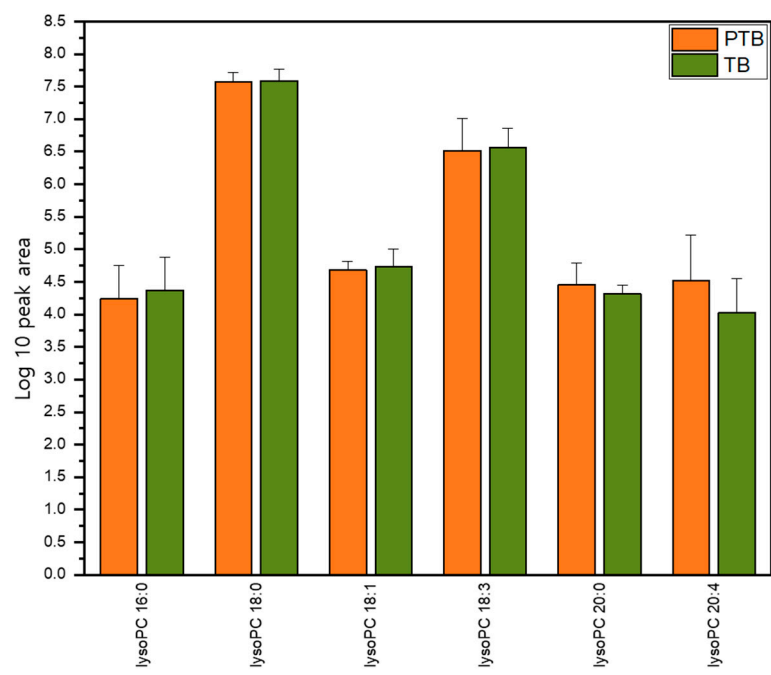

Supplement: s1 [file s1]
